# Supplementary material
Source: Springer Nature journal article supplement (https://www.springermedizin.de/resource/supplementary/12990_2010_320_MOESM7_ESM.pdf/9613026)

A

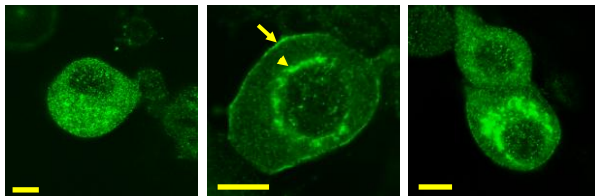

B

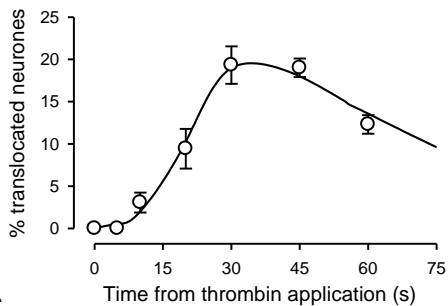

D

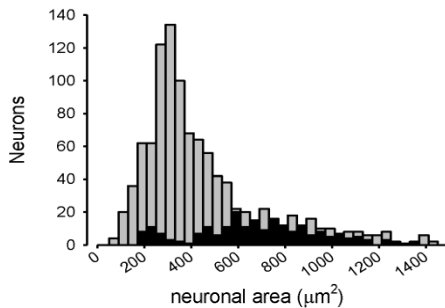

C

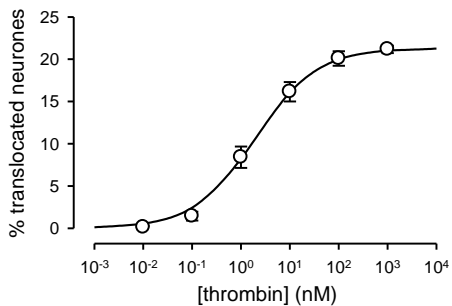

E

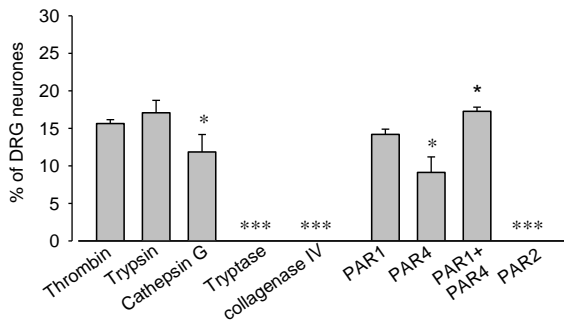

Supplement: MOESM7 [file 9613026]
